# Supplementary material for: Decreased Expression of ACADSB Predicts Poor Prognosis in Clear Cell Renal Cell Carcinoma
Source: Front Oncol. 2022 Jan 13;11:762629. doi: 10.3389/fonc.2021.762629 (PMC8791850; doi:10.3389/fonc.2021.762629)
Supplement: Supplementary file 3 [file Table_2.xlsx]

## Sheet: Sheet 1
Supplementary Table 2. Results GO and KEGG enrichment analysis.
ONTOLOGY	ID	Description	GeneRatio	BgRatio	pvalue	p.adjust	qvalue	geneID	Count
BP	GO:0016054	organic acid catabolic process	27/180	275/18670	1.20138e-19	1.35636e-16	1.30888e-16	ABAT/ACADSB/ACAT1/ALDH3A2/ALDH7A1/BCKDHB/CPT2/DLD/EHHADH/ETFA/ETFDH/GOT1/HADHB/ALDH6A1/PHYH/PPARA/AASS/ACAA2/ECI2/SLC25A17/SLC27A2/HIBCH/CRYL1/HAO2/PCYOX1/BDH2/LDHD	27
BP	GO:0046395	carboxylic acid catabolic process	27/180	275/18670	1.20138e-19	1.35636e-16	1.30888e-16	ABAT/ACADSB/ACAT1/ALDH3A2/ALDH7A1/BCKDHB/CPT2/DLD/EHHADH/ETFA/ETFDH/GOT1/HADHB/ALDH6A1/PHYH/PPARA/AASS/ACAA2/ECI2/SLC25A17/SLC27A2/HIBCH/CRYL1/HAO2/PCYOX1/BDH2/LDHD	27
BP	GO:0044282	small molecule catabolic process	31/180	445/18670	4.32978e-18	3.25888e-15	3.14479e-15	ABAT/ACADSB/ACAT1/ADH5/ALDH3A2/ALDH7A1/BCKDHB/CPT2/DLD/EHHADH/ETFA/ETFDH/GOT1/HADHB/IMPA2/ALDH6A1/OXCT1/PHYH/PPARA/AASS/ACAA2/ECI2/SLC25A17/SLC27A2/HIBCH/CRYL1/HAO2/PCYOX1/BDH2/CDADC1/LDHD	31
BP	GO:0072329	monocarboxylic acid catabolic process	19/180	132/18670	3.05527e-17	1.7247e-14	1.66432e-14	ABAT/ACAT1/ALDH3A2/CPT2/EHHADH/ETFA/ETFDH/HADHB/PHYH/PPARA/ACAA2/ECI2/SLC25A17/SLC27A2/HIBCH/CRYL1/HAO2/BDH2/LDHD	19
BP	GO:0019395	fatty acid oxidation	16/180	99/18670	1.60007e-15	7.22593e-13	6.97295e-13	ACAT1/ALDH3A2/CPT2/EHHADH/ETFA/ETFDH/HADHB/PHYH/PPARA/ACAA2/ECI2/SLC25A17/SLC27A2/HIBCH/HAO2/BDH2	16
BP	GO:0034440	lipid oxidation	16/180	101/18670	2.22604e-15	8.37734e-13	8.08405e-13	ACAT1/ALDH3A2/CPT2/EHHADH/ETFA/ETFDH/HADHB/PHYH/PPARA/ACAA2/ECI2/SLC25A17/SLC27A2/HIBCH/HAO2/BDH2	16
BP	GO:0009062	fatty acid catabolic process	16/180	108/18670	6.68405e-15	2.15608e-12	2.0806e-12	ACAT1/ALDH3A2/CPT2/EHHADH/ETFA/ETFDH/HADHB/PHYH/PPARA/ACAA2/ECI2/SLC25A17/SLC27A2/HIBCH/HAO2/BDH2	16
BP	GO:0006635	fatty acid beta-oxidation	13/180	72/18670	1.73605e-13	4.90001e-11	4.72846e-11	ACAT1/CPT2/EHHADH/ETFA/ETFDH/HADHB/PPARA/ACAA2/ECI2/SLC25A17/SLC27A2/HIBCH/BDH2	13
BP	GO:0006631	fatty acid metabolic process	23/180	383/18670	2.73363e-12	6.85837e-10	6.61826e-10	ACADSB/ACAT1/ALDH3A2/CPT2/DLD/EHHADH/EPHX2/ETFA/ETFDH/HADHB/PHYH/PPARA/ACSM3/HSD17B8/ACAA2/ECI2/SLC25A17/SLC27A2/LIAS/HIBCH/CRYL1/HAO2/BDH2	23
BP	GO:0030258	lipid modification	18/180	238/18670	1.69893e-11	3.83618e-09	3.70187e-09	ACAT1/ALDH3A2/CPT2/EHHADH/EPHX2/ETFA/ETFDH/HADHB/IMPA2/PHYH/PPARA/ACAA2/ECI2/SLC25A17/SLC27A2/HIBCH/HAO2/BDH2	18
BP	GO:0044242	cellular lipid catabolic process	16/180	217/18670	3.47151e-10	7.12607e-08	6.87659e-08	ACAT1/ALDH3A2/CPT2/EHHADH/ETFA/ETFDH/HADHB/PHYH/PPARA/ACAA2/ECI2/SLC25A17/SLC27A2/HIBCH/HAO2/BDH2	16
BP	GO:0009063	cellular amino acid catabolic process	11/180	125/18670	3.52388e-08	5.73376e-06	5.53302e-06	ABAT/ACADSB/ACAT1/ALDH7A1/BCKDHB/DLD/GOT1/ALDH6A1/AASS/HIBCH/PCYOX1	11
BP	GO:0009081	branched-chain amino acid metabolic process	6/180	21/18670	3.55503e-08	5.73376e-06	5.53302e-06	ACADSB/ACAT1/BCKDHB/DLD/ALDH6A1/HIBCH	6
BP	GO:0009083	branched-chain amino acid catabolic process	6/180	21/18670	3.55503e-08	5.73376e-06	5.53302e-06	ACADSB/ACAT1/BCKDHB/DLD/ALDH6A1/HIBCH	6
BP	GO:0016042	lipid catabolic process	16/180	333/18670	1.52362e-07	2.29356e-05	2.21326e-05	ACAT1/ALDH3A2/CPT2/EHHADH/ETFA/ETFDH/HADHB/PHYH/PPARA/ACAA2/ECI2/SLC25A17/SLC27A2/HIBCH/HAO2/BDH2	16
BP	GO:0006625	protein targeting to peroxisome	8/180	68/18670	2.88361e-07	3.61733e-05	3.49069e-05	CAT/EHHADH/EPHX2/PEX1/PHYH/ECI2/SLC27A2/HAO2	8
BP	GO:0072662	protein localization to peroxisome	8/180	68/18670	2.88361e-07	3.61733e-05	3.49069e-05	CAT/EHHADH/EPHX2/PEX1/PHYH/ECI2/SLC27A2/HAO2	8
BP	GO:0072663	establishment of protein localization to peroxisome	8/180	68/18670	2.88361e-07	3.61733e-05	3.49069e-05	CAT/EHHADH/EPHX2/PEX1/PHYH/ECI2/SLC27A2/HAO2	8
BP	GO:0043574	peroxisomal transport	8/180	69/18670	3.23516e-07	3.84473e-05	3.71013e-05	CAT/EHHADH/EPHX2/PEX1/PHYH/ECI2/SLC27A2/HAO2	8
BP	GO:0006605	protein targeting	17/180	432/18670	1.01878e-06	0.000115021	0.000110994	CAT/EHHADH/EPHX2/PEX1/PHYH/SRP9/SEC62/UQCRC2/ECI2/VTI1B/SLC27A2/TIMM21/HAO2/ZDHHC6/IMMP2L/RAB3IP/MTERF4	17
BP	GO:0007031	peroxisome organization	8/180	81/18670	1.12795e-06	0.000121281	0.000117035	CAT/EHHADH/EPHX2/PEX1/PHYH/ECI2/SLC27A2/HAO2	8
BP	GO:0046950	cellular ketone body metabolic process	4/180	11/18670	2.61575e-06	0.000268471	0.000259071	ACAT1/OXCT1/BDH2/ACSS3	4
BP	GO:1902224	ketone body metabolic process	4/180	12/18670	3.89408e-06	0.000382297	0.000368913	ACAT1/OXCT1/BDH2/ACSS3	4
BP	GO:0045333	cellular respiration	10/180	193/18670	1.84194e-05	0.00173296	0.00167229	CAT/DLD/ETFA/ETFDH/NDUFA5/UQCRC2/SUCLA2/FAHD1/IMMP2L/LYRM7	10
BP	GO:0009068	aspartate family amino acid catabolic process	4/180	23/18670	6.4113e-05	0.00521345	0.00503093	ALDH7A1/DLD/GOT1/AASS	4
BP	GO:0033865	nucleoside bisphosphate metabolic process	8/180	140/18670	6.46487e-05	0.00521345	0.00503093	ACAT1/DLD/ACSM3/HSD17B8/SUCLA2/AASS/MPC1/PANK1	8
BP	GO:0033875	ribonucleoside bisphosphate metabolic process	8/180	140/18670	6.46487e-05	0.00521345	0.00503093	ACAT1/DLD/ACSM3/HSD17B8/SUCLA2/AASS/MPC1/PANK1	8
BP	GO:0034032	purine nucleoside bisphosphate metabolic process	8/180	140/18670	6.46487e-05	0.00521345	0.00503093	ACAT1/DLD/ACSM3/HSD17B8/SUCLA2/AASS/MPC1/PANK1	8
BP	GO:0006637	acyl-CoA metabolic process	7/180	105/18670	7.08226e-05	0.00533058	0.00514396	ACAT1/DLD/ACSM3/HSD17B8/SUCLA2/AASS/MPC1	7
BP	GO:0035383	thioester metabolic process	7/180	105/18670	7.08226e-05	0.00533058	0.00514396	ACAT1/DLD/ACSM3/HSD17B8/SUCLA2/AASS/MPC1	7
BP	GO:1901606	alpha-amino acid catabolic process	7/180	106/18670	7.52209e-05	0.00547899	0.00528717	ACAT1/ALDH7A1/DLD/GOT1/ALDH6A1/AASS/HIBCH	7
BP	GO:0022900	electron transport chain	9/180	186/18670	8.24225e-05	0.00581594	0.00561232	ADH5/DLD/ETFA/ETFDH/FDX1/NDUFA5/UQCRC2/DMGDH/IMMP2L	9
BP	GO:0015980	energy derivation by oxidation of organic compounds	11/180	285/18670	0.00010442	0.00714489	0.00689475	CAT/DLD/ETFA/ETFDH/NDUFA5/PHKB/UQCRC2/SUCLA2/FAHD1/IMMP2L/LYRM7	11
BP	GO:0009066	aspartate family amino acid metabolic process	5/180	54/18670	0.000169981	0.0112887	0.0108935	ALDH7A1/DLD/GOT1/AASS/APIP	5
BP	GO:0006554	lysine catabolic process	3/180	12/18670	0.000181869	0.0117331	0.0113224	ALDH7A1/DLD/AASS	3
BP	GO:0006520	cellular amino acid metabolic process	12/180	366/18670	0.000234069	0.0143264	0.0138248	ABAT/ACADSB/ACAT1/ALDH7A1/BCKDHB/DLD/GOT1/ALDH6A1/AASS/HIBCH/APIP/PCYOX1	12
BP	GO:0006553	lysine metabolic process	3/180	13/18670	0.000234755	0.0143264	0.0138248	ALDH7A1/DLD/AASS	3
BP	GO:0006103	2-oxoglutarate metabolic process	3/180	16/18670	0.000449969	0.0267377	0.0258016	DLD/GOT1/PHYH	3
BP	GO:0006084	acetyl-CoA metabolic process	4/180	38/18670	0.00047746	0.0270207	0.0260747	ACAT1/DLD/AASS/MPC1	4
BP	GO:0033866	nucleoside bisphosphate biosynthetic process	5/180	68/18670	0.000502599	0.0270207	0.0260747	ACAT1/DLD/HSD17B8/MPC1/PANK1	5
BP	GO:0034030	ribonucleoside bisphosphate biosynthetic process	5/180	68/18670	0.000502599	0.0270207	0.0260747	ACAT1/DLD/HSD17B8/MPC1/PANK1	5
BP	GO:0034033	purine nucleoside bisphosphate biosynthetic process	5/180	68/18670	0.000502599	0.0270207	0.0260747	ACAT1/DLD/HSD17B8/MPC1/PANK1	5
BP	GO:0006066	alcohol metabolic process	11/180	364/18670	0.00083607	0.0439034	0.0423663	ADH5/ALDH3A2/CAT/EPHX2/FDX1/GOT1/IDI1/IMPA2/PLCL1/ACAA2/TTC39B	11
BP	GO:0022904	respiratory electron transport chain	6/180	117/18670	0.00095459	0.0489878	0.0472727	DLD/ETFA/ETFDH/NDUFA5/UQCRC2/IMMP2L	6
BP	GO:0006790	sulfur compound metabolic process	11/180	372/18670	0.000997321	0.0491951	0.0474728	ACAT1/DLD/ACSM3/HSD17B8/SUCLA2/AASS/LIAS/APIP/PCYOX1/MPC1/NUBPL	11
BP	GO:0015718	monocarboxylic acid transport	7/180	162/18670	0.0010022	0.0491951	0.0474728	ABAT/CPT2/PPARA/SLC25A17/SLC27A2/MPC1/SLC16A9	7
BP	GO:0042135	neurotransmitter catabolic process	3/180	21/18670	0.00103146	0.0495539	0.047819	ABAT/ALDH7A1/DMGDH	3
BP	GO:0006085	acetyl-CoA biosynthetic process	3/180	22/18670	0.00118589	0.0557865	0.0538334	ACAT1/DLD/MPC1	3
BP	GO:0044782	cilium organization	11/180	384/18670	0.00128681	0.0592985	0.0572224	ARL3/ABLIM1/EXOC5/ATP6V1D/DYNC2LI1/LRRC49/FNBP1L/DYNC2H1/RAB3IP/BBS12/POC1B	11
BP	GO:0009067	aspartate family amino acid biosynthetic process	3/180	23/18670	0.00135416	0.061154	0.059013	GOT1/AASS/APIP	3
BP	GO:1901605	alpha-amino acid metabolic process	8/180	222/18670	0.00143227	0.063413	0.0611929	ACAT1/ALDH7A1/DLD/GOT1/ALDH6A1/AASS/HIBCH/APIP	8
BP	GO:0009060	aerobic respiration	5/180	87/18670	0.00153808	0.0667881	0.0644498	CAT/DLD/UQCRC2/SUCLA2/FAHD1	5
BP	GO:0042073	intraciliary transport	4/180	53/18670	0.00169298	0.0721274	0.0696022	ARL3/DYNC2LI1/DYNC2H1/BBS12	4
BP	GO:0097186	amelogenesis	3/180	25/18670	0.00173395	0.0725049	0.0699665	ITGA6/PPARA/WDR72	3
BP	GO:0035384	thioester biosynthetic process	4/180	54/18670	0.00181482	0.0728242	0.0702746	ACAT1/DLD/HSD17B8/MPC1	4
BP	GO:0071616	acyl-CoA biosynthetic process	4/180	54/18670	0.00181482	0.0728242	0.0702746	ACAT1/DLD/HSD17B8/MPC1	4
BP	GO:0030705	cytoskeleton-dependent intracellular transport	7/180	180/18670	0.00183834	0.0728242	0.0702746	ARL3/PURA/DYNC2LI1/FNBP1L/ACTR10/DYNC2H1/BBS12	7
BP	GO:0006732	coenzyme metabolic process	11/180	403/18670	0.0018842	0.0733537	0.0707856	ACAT1/DLD/PPARA/ACSM3/HSD17B8/SUCLA2/AASS/LIAS/APIP/MPC1/PANK1	11
BP	GO:0033108	mitochondrial respiratory chain complex assembly	5/180	96/18670	0.00237378	0.0908474	0.0876668	NDUFA5/TIMM21/NUBPL/IMMP2L/LYRM7	5
CC	GO:0005759	mitochondrial matrix	28/188	469/19717	8.70788e-15	2.7604e-12	2.55737e-12	ABAT/ACADSB/ACAT1/ALDH7A1/BCKDHB/DLD/ETFA/ETFDH/FDX1/HADHB/ALDH6A1/OXCT1/ACSM3/UQCRC2/HSD17B8/SUCLA2/MRPL19/AASS/ACAA2/LIAS/HIBCH/MRPS18B/DMGDH/ACSS3/NUBPL/FAHD1/LYRM7/MTERF4	28
CC	GO:0044438	microbody part	11/188	100/19717	2.99222e-09	3.16178e-07	2.92923e-07	ALDH3A2/CAT/EHHADH/EPHX2/PEX1/PHYH/ECI2/SLC25A17/SLC27A2/HAO2/ATAD1	11
CC	GO:0044439	peroxisomal part	11/188	100/19717	2.99222e-09	3.16178e-07	2.92923e-07	ALDH3A2/CAT/EHHADH/EPHX2/PEX1/PHYH/ECI2/SLC25A17/SLC27A2/HAO2/ATAD1	11
CC	GO:0005777	peroxisome	12/188	134/19717	6.07698e-09	3.8528e-07	3.56942e-07	ALDH3A2/CAT/EHHADH/EPHX2/IDI1/PEX1/PHYH/ECI2/SLC25A17/SLC27A2/HAO2/ATAD1	12
CC	GO:0042579	microbody	12/188	134/19717	6.07698e-09	3.8528e-07	3.56942e-07	ALDH3A2/CAT/EHHADH/EPHX2/IDI1/PEX1/PHYH/ECI2/SLC25A17/SLC27A2/HAO2/ATAD1	12
CC	GO:0005782	peroxisomal matrix	6/188	51/19717	8.74749e-06	0.000396136	0.000367	CAT/EHHADH/EPHX2/PHYH/ECI2/HAO2	6
CC	GO:0031907	microbody lumen	6/188	51/19717	8.74749e-06	0.000396136	0.000367	CAT/EHHADH/EPHX2/PHYH/ECI2/HAO2	6
CC	GO:0005778	peroxisomal membrane	6/188	60/19717	2.26489e-05	0.000797743	0.000739068	ALDH3A2/CAT/PEX1/SLC25A17/SLC27A2/ATAD1	6
CC	GO:0031903	microbody membrane	6/188	60/19717	2.26489e-05	0.000797743	0.000739068	ALDH3A2/CAT/PEX1/SLC25A17/SLC27A2/ATAD1	6
CC	GO:0005743	mitochondrial inner membrane	14/188	473/19717	0.000185857	0.00589165	0.00545831	SLC25A4/CPT2/ETFDH/HADHB/NDUFA5/UQCRC2/MRPL19/GHITM/MRPS18B/TIMM21/MPC1/IMMP2L/LDHD/MICU2	14
CC	GO:0045239	tricarboxylic acid cycle enzyme complex	3/188	14/19717	0.000287402	0.00828239	0.00767321	BCKDHB/DLD/SUCLA2	3
CC	GO:0044455	mitochondrial membrane part	9/188	229/19717	0.000362757	0.00958283	0.008878	SLC25A4/ETFDH/NDUFA5/UQCRC2/TIMM21/ARMCX3/MPC1/IMMP2L/MICU2	9
CC	GO:0098798	mitochondrial protein complex	9/188	262/19717	0.000951607	0.0232046	0.0214979	BCKDHB/NDUFA5/UQCRC2/MRPL19/MRPS18B/TIMM21/IMMP2L/MTERF4/MICU2	9
MF	GO:0050662	coenzyme binding	18/182	291/17697	1.27559e-09	5.53606e-07	5.08893e-07	ABAT/ACADSB/ACAT1/CAT/CRY2/DLD/ETFA/ETFDH/GOT1/ALDH6A1/PHYH/HSD17B8/ECI2/CRYL1/HAO2/PANK1/BDH2/LDHD	18
MF	GO:0016903	oxidoreductase activity, acting on the aldehyde or oxo group of donors	6/182	43/17697	4.84213e-06	0.0010185	0.000936238	ADH5/ALDH3A2/ALDH7A1/BCKDHB/DLD/ALDH6A1	6
MF	GO:0016614	oxidoreductase activity, acting on CH-OH group of donors	9/182	128/17697	7.04031e-06	0.0010185	0.000936238	ADH5/ALDH3A2/EHHADH/HADHB/HSD17B8/CRYL1/HAO2/BDH2/LDHD	9
MF	GO:0016620	oxidoreductase activity, acting on the aldehyde or oxo group of donors, NAD or NADP as acceptor	5/182	35/17697	2.75212e-05	0.00298605	0.00274488	ADH5/ALDH3A2/ALDH7A1/DLD/ALDH6A1	5
MF	GO:0016408	C-acyltransferase activity	4/182	20/17697	4.60989e-05	0.00400138	0.0036782	ACAT1/HADHB/ACSM3/ACAA2	4
MF	GO:0050660	flavin adenine dinucleotide binding	6/182	79/17697	0.000162582	0.0117601	0.0108103	ACADSB/CRY2/DLD/ETFA/ETFDH/LDHD	6
MF	GO:0016616	oxidoreductase activity, acting on the CH-OH group of donors, NAD or NADP as acceptor	7/182	119/17697	0.000230544	0.0130541	0.0119997	ADH5/EHHADH/HADHB/HSD17B8/CRYL1/BDH2/LDHD	7
MF	GO:0016878	acid-thiol ligase activity	4/182	30/17697	0.000240628	0.0130541	0.0119997	ACSM3/SUCLA2/SLC27A2/ACSS3	4
MF	GO:0016863	intramolecular oxidoreductase activity, transposing C=C bonds	3/182	14/17697	0.000358261	0.0170829	0.0157032	EHHADH/IDI1/ECI2	3
MF	GO:0004029	aldehyde dehydrogenase (NAD) activity	3/182	15/17697	0.000444446	0.0170829	0.0157032	ADH5/ALDH3A2/ALDH7A1	3
MF	GO:0051536	iron-sulfur cluster binding	5/182	63/17697	0.000472338	0.0170829	0.0157032	ABAT/ETFDH/FDX1/LIAS/NUBPL	5
MF	GO:0051540	metal cluster binding	5/182	63/17697	0.000472338	0.0170829	0.0157032	ABAT/ETFDH/FDX1/LIAS/NUBPL	5
MF	GO:0016877	ligase activity, forming carbon-sulfur bonds	4/182	40/17697	0.000740702	0.0247281	0.0227309	ACSM3/SUCLA2/SLC27A2/ACSS3	4
MF	GO:0009055	electron transfer activity	6/182	114/17697	0.00116047	0.0359745	0.033069	ADH5/DLD/ETFA/ETFDH/FDX1/DMGDH	6
MF	GO:0016405	CoA-ligase activity	3/182	26/17697	0.00233717	0.0633956	0.0582754	ACSM3/SLC27A2/ACSS3	3
MF	GO:0030371	translation repressor activity	3/182	26/17697	0.00233717	0.0633956	0.0582754	EIF4EBP2/PURA/PAIP2B	3
MF	GO:0051287	NAD binding	4/182	56/17697	0.0026203	0.0668947	0.0614919	DLD/HSD17B8/CRYL1/BDH2	4
MF	GO:0016645	oxidoreductase activity, acting on the CH-NH group of donors	3/182	28/17697	0.00290081	0.0699417	0.0642927	ETFDH/AASS/DMGDH	3
KEGG	hsa00280	Valine, leucine and isoleucine degradation	13/107	48/8076	2.41394e-14	3.37951e-12	2.97295e-12	ABAT/ACADSB/ACAT1/ALDH3A2/ALDH7A1/BCKDHB/DLD/EHHADH/HADHB/ALDH6A1/OXCT1/ACAA2/HIBCH	13
KEGG	hsa00071	Fatty acid degradation	10/107	44/8076	1.85477e-10	1.29834e-08	1.14215e-08	ACADSB/ACAT1/ADH5/ALDH3A2/ALDH7A1/CPT2/EHHADH/HADHB/ACAA2/ECI2	10
KEGG	hsa00640	Propanoate metabolism	9/107	34/8076	3.56345e-10	1.66295e-08	1.46289e-08	ABAT/ACAT1/BCKDHB/DLD/EHHADH/ALDH6A1/SUCLA2/HIBCH/ACSS3	9
KEGG	hsa04146	Peroxisome	9/107	83/8076	1.30322e-06	3.91075e-05	3.44029e-05	CAT/EHHADH/EPHX2/PEX1/PHYH/ECI2/SLC25A17/SLC27A2/HAO2	9
KEGG	hsa00650	Butanoate metabolism	6/107	28/8076	1.3967e-06	3.91075e-05	3.44029e-05	ABAT/ACAT1/EHHADH/OXCT1/ACSM3/BDH2	6
KEGG	hsa00410	beta-Alanine metabolism	6/107	30/8076	2.15447e-06	5.0271e-05	4.42234e-05	ABAT/ALDH3A2/ALDH7A1/EHHADH/ALDH6A1/HIBCH	6
KEGG	hsa01200	Carbon metabolism	10/107	118/8076	3.22687e-06	6.45373e-05	5.67734e-05	ACAT1/ADH5/CAT/DLD/EHHADH/GOT1/ALDH6A1/SUCLA2/HIBCH/HAO2	10
KEGG	hsa01212	Fatty acid metabolism	7/107	57/8076	9.0223e-06	0.00015789	0.000138896	ACADSB/ACAT1/CPT2/EHHADH/HADHB/HSD17B8/ACAA2	7
KEGG	hsa00380	Tryptophan metabolism	6/107	42/8076	1.67313e-05	0.000260265	0.000228955	ACAT1/ALDH3A2/ALDH7A1/CAT/DLD/EHHADH	6
KEGG	hsa00620	Pyruvate metabolism	5/107	39/8076	0.000149537	0.00209351	0.00184166	ACAT1/ALDH3A2/ALDH7A1/DLD/LDHD	5
KEGG	hsa00310	Lysine degradation	6/107	63/8076	0.000173026	0.00220215	0.00193723	ACAT1/ALDH3A2/ALDH7A1/DLD/EHHADH/AASS	6
KEGG	hsa00072	Synthesis and degradation of ketone bodies	3/107	10/8076	0.00025361	0.00295878	0.00260284	ACAT1/OXCT1/BDH2	3
KEGG	hsa00630	Glyoxylate and dicarboxylate metabolism	4/107	30/8076	0.000612223	0.00659317	0.00580001	ACAT1/CAT/DLD/HAO2	4
KEGG	hsa00900	Terpenoid backbone biosynthesis	3/107	22/8076	0.00289912	0.0289912	0.0255035	ACAT1/IDI1/PCYOX1	3
KEGG	hsa03060	Protein export	3/107	23/8076	0.00330212	0.0308198	0.0271121	SRP9/SEC62/IMMP2L	3
KEGG	hsa00350	Tyrosine metabolism	3/107	36/8076	0.0117565	0.0970428	0.0853685	ADH5/GOT1/FAHD1	3
KEGG	hsa00010	Glycolysis / Gluconeogenesis	4/107	67/8076	0.0117838	0.0970428	0.0853685	ADH5/ALDH3A2/ALDH7A1/DLD	4
